# Supplementary material for: JAK-STAT Blockade Inhibits Tumor Initiation and Clonogenic Recovery of Prostate Cancer Stem-like Cells
Source: Oxford University Press journal article supplement (doi:10.1158/0008-5472.can-13-0874), 2013-07-04
Supplement: 00085472can130874-sup-table_1.pdf [file 00085472can130874-sup-table_1.pdf]

Supplementary Table 1

**Table 1.** mRNA expression of IL-6 (fold change) in prostatic primary cultures.

| Samples (no) | Cell Populations |              |              |
|--------------|------------------|--------------|--------------|
|              | SC               | TA           | CB           |
| BPH          | 0.757            | 0.398        | 1.166        |
| BPH          | 6.360            | 8.222        | 4.496        |
| BPH          | 2.433            | 6.667        | 3.617        |
| BPH          | 6.882            | 0.433        | 0.166        |
| BPH          | 2.240            | 0.840        | 0.399        |
| HNPC (1)     | 134.84           | 92.39        | 8.14         |
| HNPC (2)     | 19.67            | 13.60        | 2.46         |
| HNPC (3)     | 11.37            | 12.14        | 7.93         |
| HNPC (4)     | 6.80             | Undetectable | Undetectable |
| HT (12)      | 0.411            | 0.289        | 0.787        |
| HT (13)      | 0.313            | 1.224        | 1.303        |
| HT (14)      | Undetectable     | 0.702        | 5.840        |
| HT (15)      | Undetectable     | 0.067        | 0.201        |
| HT (16)      | Undetectable     | 1.326        | 21.176       |

qRT-PCR of IL-6 on sorted cell populations derived from patients with BPH, hormone naive (HNPC, samples 1-4) and hormone-treated prostate cancer (HT, samples 12-16). The results are normalised to the housekeeping gene RPLP0 and the fold difference is relative to the average CT-value of the CB population.
